# Supplementary material
Source: PubMed Central journal article supplement (PMC9492383)

## **Appendix 1**

### **Sample size and statistical analysis**

No *a priori* sample size calculation was performed for this analysis. Categorical variables are presented with frequencies and percentages, and continuous variables with median, interquartile range (IQR) and absolute range. Univariable Cox regression model was performed with variables suspected to play a role in the mortality of HM patients with COVID-19. Variables with a p-value  $\leq 0.1$  were considered for multivariable analysis. A multivariable Cox regression model was calculated with the Wald backward method. Mortality was analysed using Kaplan–Meier survival plots. Log-rank test was used to compare the survival probability of the patients included in the different models. A p-value  $\leq 0.05$  was considered statistically significant. No *a priori* sample size calculation was done for this exploratory study. SPSSv25.0 was employed for statistical analyses (SPSS, IBM Corp., Chicago, IL, United States).

**Supplementary tables**

| <b>Supplemental Table 1. Comorbidities observed and mortality</b>                       |              |          |              |          |             |          |
|-----------------------------------------------------------------------------------------|--------------|----------|--------------|----------|-------------|----------|
|                                                                                         | <b>Total</b> |          | <b>Alive</b> |          | <b>Dead</b> |          |
|                                                                                         | <b>n</b>     | <b>%</b> | <b>n</b>     | <b>%</b> | <b>n</b>    | <b>%</b> |
| Chronic cardiopathy<br>(atrial fibrillation, hypertension, obstructive arteriopathy...) | 620          | 40.1     | 507          | 81.8     | 113         | 18.2     |
| Chronic pulmonary disease<br>(asthma, COPD, cystic fibrosis, fibrosis...)               | 174          | 11.2     | 143          | 82.2     | 31          | 17.8     |
| Diabetes mellitus<br>(treated with insulin or antidiabetic oral drugs)                  | 192          | 12.4     | 159          | 82.8     | 33          | 17.2     |
| Liver disease                                                                           | 50           | 3.2      | 41           | 82.0     | 9           | 18.0     |
| Obesity                                                                                 | 101          | 6.5      | 91           | 90.1     | 10          | 9.9      |
| Renal impairment<br>(Creatinine> 2mg/dl)                                                | 83           | 5.4      | 61           | 73.5     | 22          | 26.5     |

| <b>Supplemental Table 2. COVID-19 treatment</b>                         |              |              |             |             |             |
|-------------------------------------------------------------------------|--------------|--------------|-------------|-------------|-------------|
|                                                                         | <b>Total</b> | <b>Alive</b> |             | <b>Dead</b> |             |
|                                                                         | <b>n</b>     | <b>n</b>     | <b>%</b>    | <b>n</b>    | <b>%</b>    |
| <b>Not specific (antihistamines. anti-inflammatories. antipyretics)</b> | <b>642</b>   | <b>618</b>   | <b>96.3</b> | <b>24</b>   | <b>3.7</b>  |
| <b>Antivirals + monoclonal antibodies</b>                               | <b>108</b>   | <b>98</b>    | <b>90.7</b> | <b>10</b>   | <b>9.3</b>  |
| <i>Acyclovir + Casiririmivab + Imdevimab</i>                            | 1            | 1            | 100.0       | 0           | 0.0         |
| <i>Favipiravir + Casiririmivab + Imdevimab</i>                          | 4            | 4            | 100.0       | 0           | 0.0         |
| <i>Molnupiravir + Sotrovimab</i>                                        | 4            | 4            | 100.0       | 0           | 0.0         |
| <i>Remdesivir   Acyclovir + Sotrovimab</i>                              | 1            | 1            | 100.0       | 0           | 0.0         |
| <i>Remdesivir   Molnupiravir + Casiririmivab + Imdevimab</i>            | 1            | 1            | 100.0       | 0           | 0.0         |
| <i>Remdesivir + Bamlanivimab + Etesivimab</i>                           | 4            | 4            | 100.0       | 0           | 0.0         |
| <i>Remdesivir + Casiririmivab + Imdevimab</i>                           | 31           | 29           | 100.0       | 2           | 0.0         |
| <i>Remdesivir + Regdanvimab</i>                                         | 5            | 5            | 100.0       | 0           | 0.0         |
| <i>Remdesivir + Sotrovimab</i>                                          | 54           | 47           | 91.3        | 7           | 8.7         |
| <i>Remdesivir + Unknown which monoclonal antibodies</i>                 | 2            | 1            | 100.0       | 1           | 0.0         |
| <i>Unknown which antivirals. Sotrovimab</i>                             | 1            | 1            | 100.0       | 0           | 0.0         |
| <b>Antivirals</b>                                                       | <b>218</b>   | <b>186</b>   | <b>85.3</b> | <b>32</b>   | <b>14.7</b> |
| <i>Acyclovir</i>                                                        | 2            | 0            | 0.0         | 2           | 100.0       |
| <i>Favipiravir</i>                                                      | 23           | 22           | 100.0       | 1           | 0.0         |
| <i>Lopinavir/Ritonavir   Emtricitabine/Tenofovir</i>                    | 1            | 1            | 100.0       | 0           | 0.0         |
| <i>Molnupiravir</i>                                                     | 29           | 26           | 89.6        | 1           | 10.4        |
| <i>Nirmatrelvir</i>                                                     | 3            | 3            | 100.0       | 0           | 0.0         |
| <i>Remdesivir</i>                                                       | 158          | 132          | 90.9        | 26          | 16.4        |
| <i>Remdesivir   Molnupiravir</i>                                        | 2            | 2            | 100.0       | 0           | 0.0         |
| <b>Corticosteroids</b>                                                  | <b>246</b>   | <b>185</b>   | <b>75.2</b> | <b>61</b>   | <b>24.8</b> |
| <b>Monoclonal antibodies</b>                                            | <b>311</b>   | <b>302</b>   | <b>97.1</b> | <b>9</b>    | <b>2.9</b>  |
| <i>Bamlanivimab + Etesivimab</i>                                        | 13           | 12           | 92.3        | 1           | 7.7         |
| <i>Casiririmivab + Imdevimab</i>                                        | 121          | 117          | 96.6        | 4           | 3.4         |
| <i>Casiririmivab + Imdevimab   Sotrovimab</i>                           | 1            | 1            | 100.0       | 0           | 0.0         |
| <i>Sarilumab   Sotrovimab</i>                                           | 1            | 1            | 100.0       | 0           | 0.0         |
| <i>Sotrovimab</i>                                                       | 156          | 152          | 97.4        | 4           | 12.6        |
| <i>Tixagevimab + Cilgavimab</i>                                         | 4            | 4            | 100.0       | 0           | 0.0         |
| <i>Unknown which monoclonal antibodies</i>                              | 15           | 15           | 100.0       | 0           | 0.0         |
| <b>Convalescent Plasma</b>                                              | <b>23</b>    | <b>16</b>    | <b>69.6</b> | <b>7</b>    | <b>30.4</b> |

**Supplementary figures**

**Supplemental Figure 1.** Patient geographical distribution. Cases were provided from 95 centers from 26 countries.

**Figure S1**

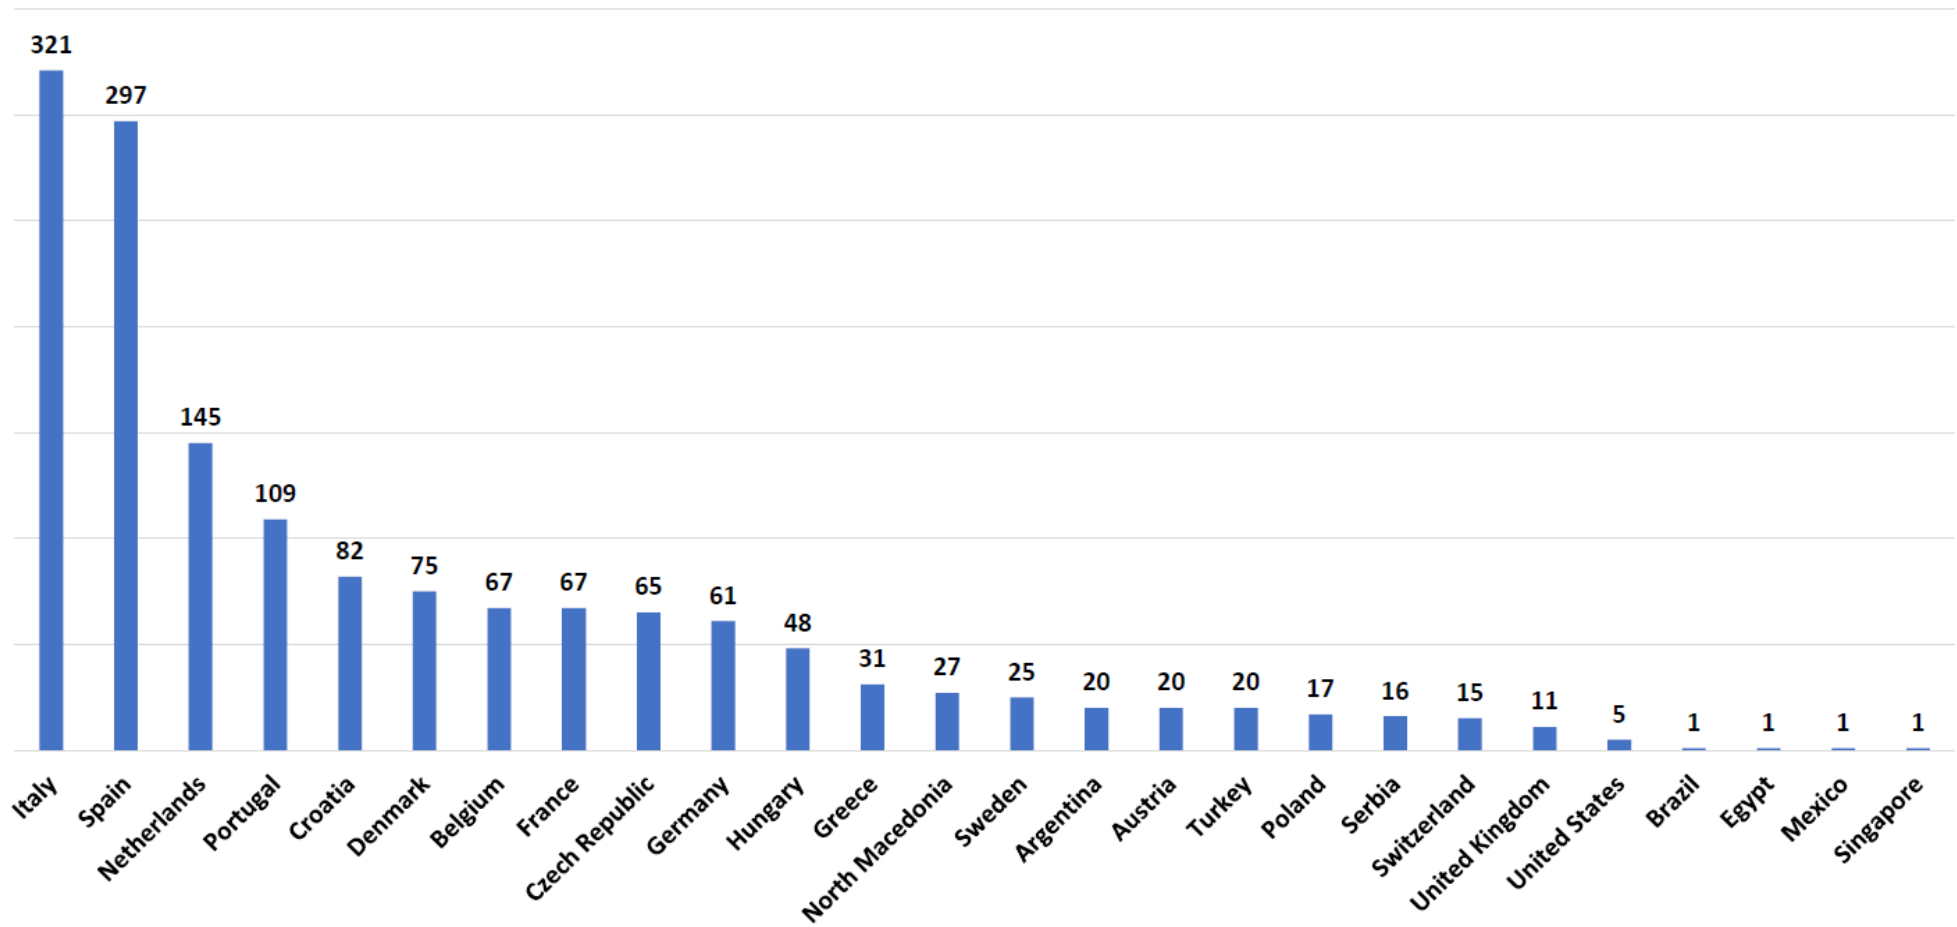

**Supplemental Figure 2.** Geographical distribution of cases per variant and type of vaccination. Panel A) Countries with centres participating in the study; Panel B) Patients with mRNA vaccine administration immediately before COVID-19; Panel C) Patients with vector-based vaccine administration immediately before COVID-19; Panel D) Patients with inactivated vaccine administration immediately before COVID-19.

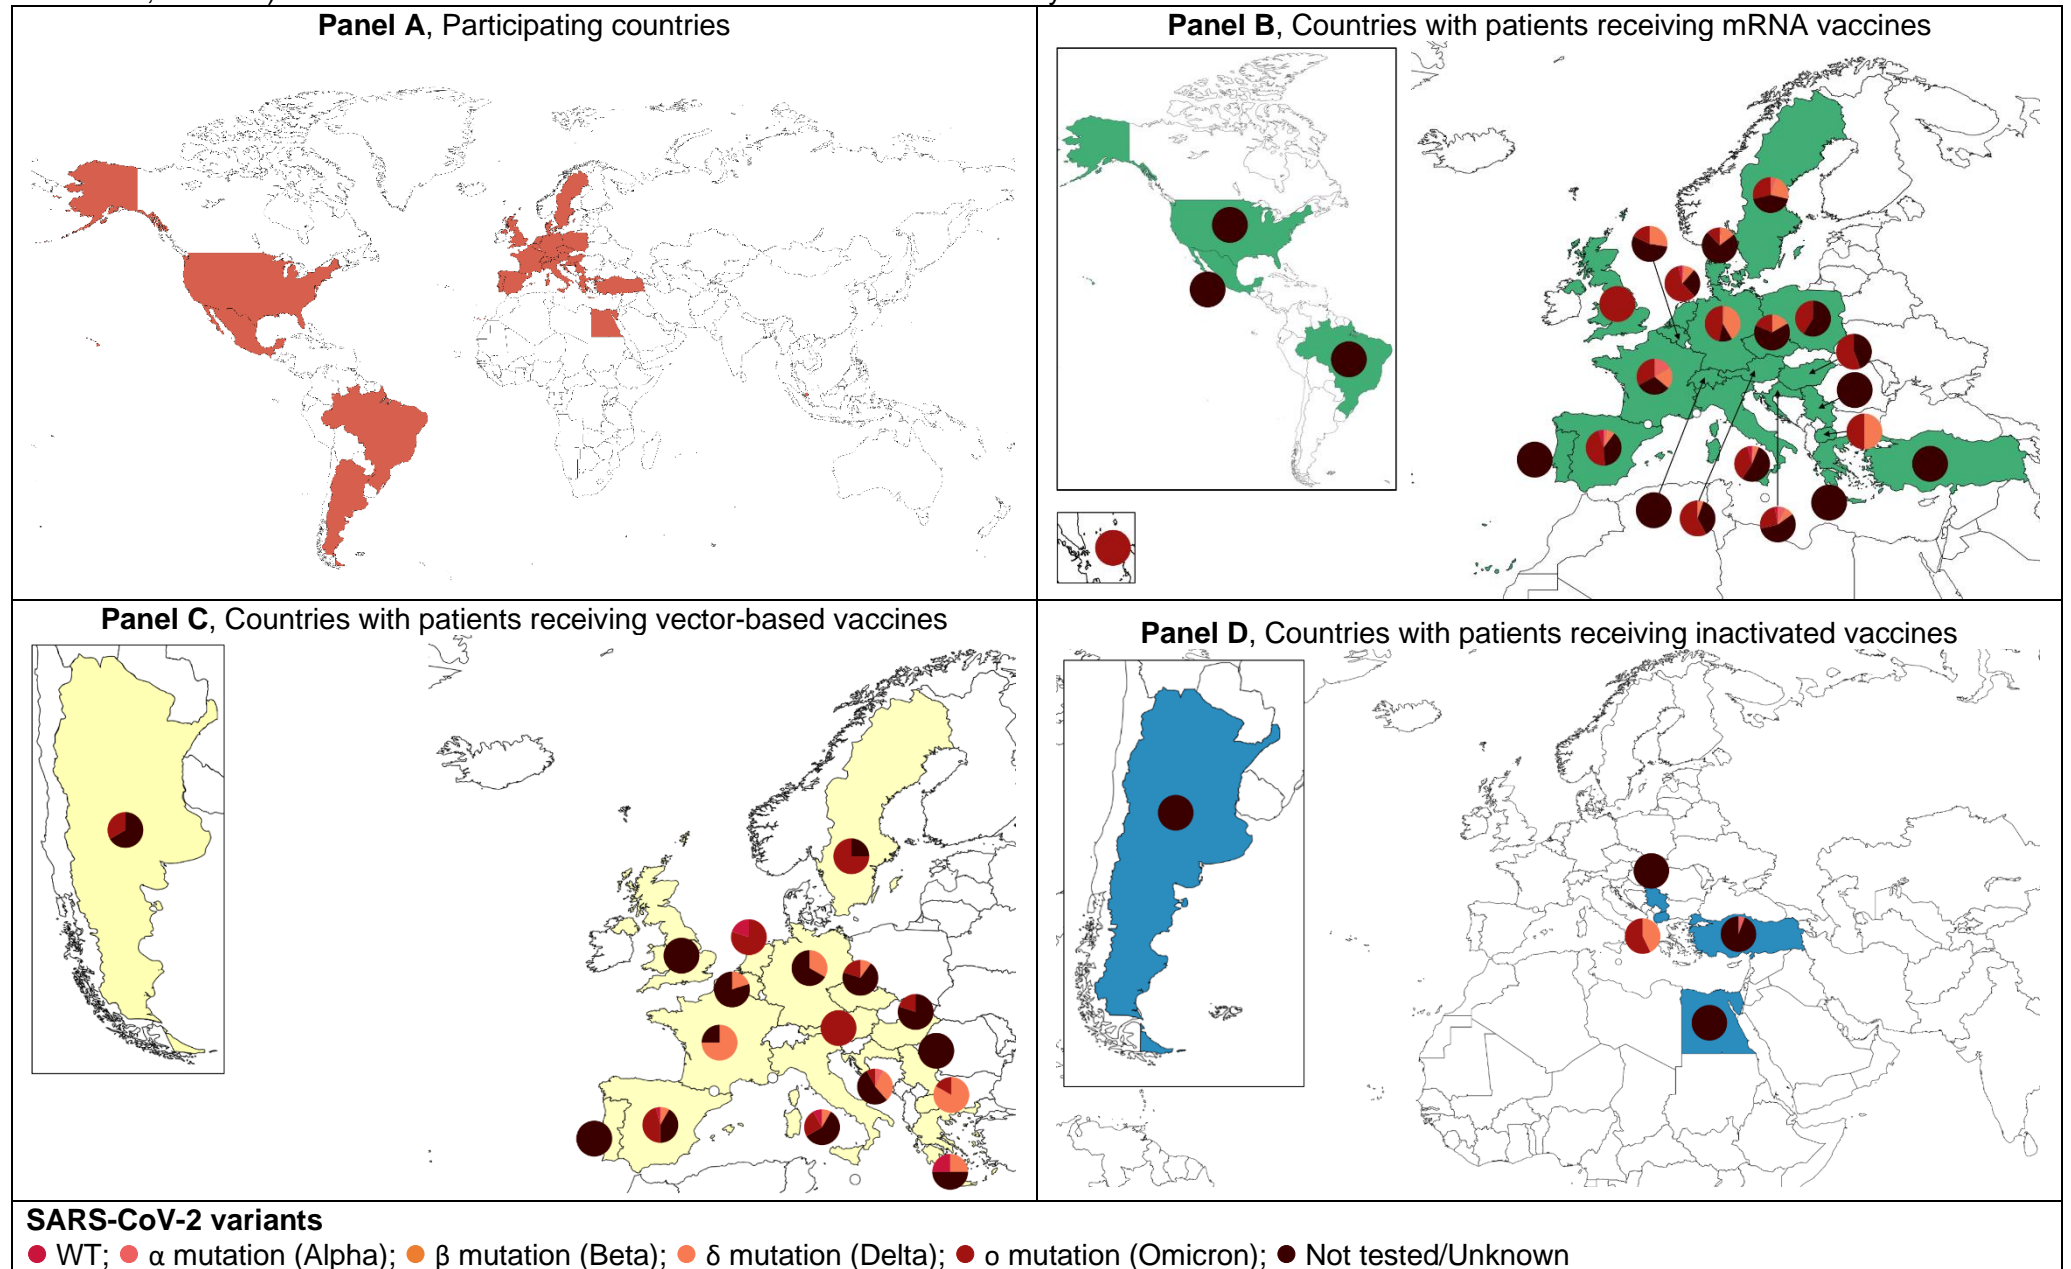

Supplement: BLOOD_BLD-2022-017257-mmc1.pdf [file BLOOD_BLD-2022-017257-mmc1.pdf]
